# Supplementary material for: Synthesis and micellization of a novel diblock copolymer of poly(N-isopropylacrylamide)-b-SGLCP and its application in stability of 5CB droplets in aqueous medium
Source: Royal Society of Chemistry journal article supplement (doi:10.1039/c0sm00758g), 2010-11-08
Supplement: c0sm00758g.pdf [file c0sm00758g.pdf]

**Synthesis and micellization of a novel diblock copolymer of poly (*N*-isopropylacrylamide)-*b*-SGLCP and its application in stability of 5CB droplets in aqueous medium**

Waliullah Khan, Jung-Min Seo, and Soo-Young Park\*

**Supplementary Information**

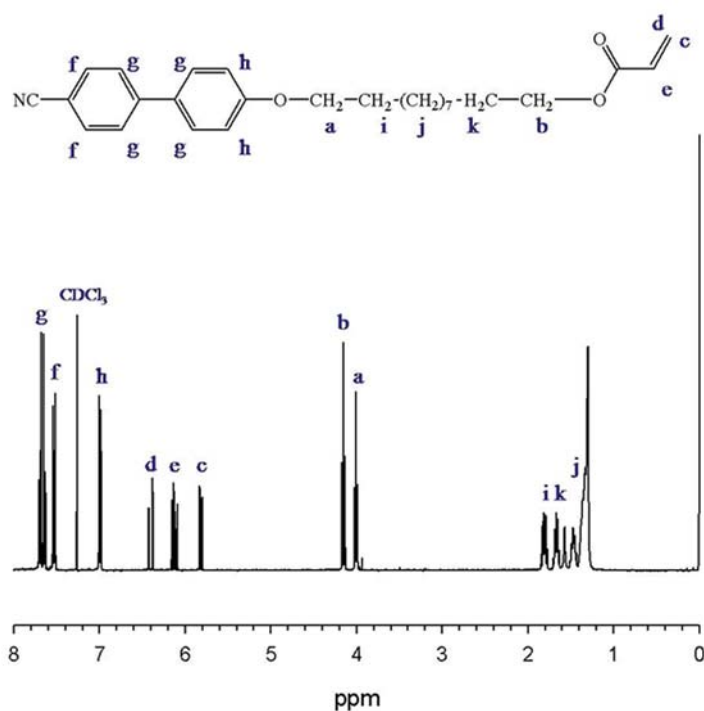

**SI 1.** The NMR spectrum of LC11: <sup>1</sup>H-NMR: δH (CDCl<sub>3</sub>): 1.2-2.0 (m, 18H, -(CH<sub>2</sub>)<sub>9</sub>), 3.9-4.0 (t, 2H, CH<sub>2</sub>-O-Ar), 4.1-4.2 (t, 2H, O-CH<sub>2</sub>), 5.73-6.35(m, 3H, =CH, CH<sub>2</sub>), 6.9-7.0 (m, 2H, aromatic), 7.4-7.5 (m, 4H, aromatic), 7.6-7.7 (m, 2H, aromatic) ppm.

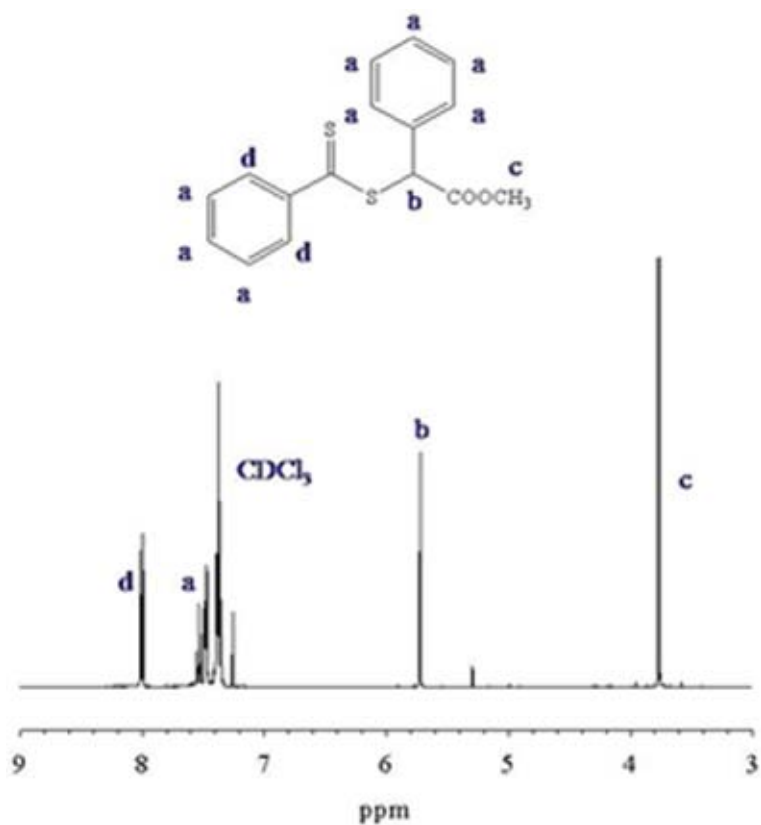

**SI 2.** The NMR spectrum of MCPDB: <sup>1</sup>H-NMR: δH (CDCl<sub>3</sub>): 3.70 (s, 3H, -O-CH<sub>3</sub>), 5.65 (s, 1H, -S(Ph)CH-CO<sub>2</sub>Me), 7.20-7.48 (m, 8H, aromatic), 7.91 (m, 2H, aromatic) ppm
